# Supplementary material for: Addition of brackish water to tundra soils does not inhibit methane production: implications for Arctic coastal methane production
Source: Copernicus journal article supplement (doi:10.5194/egusphere-2025-2570), 2025-06-26
Supplement: Supplementary file 2 [file Supplemental information.xlsx]

## Sheet: partitionning coefficient
											Sample	Day	Kgl	moles CH4 gaseous phase	vol gaseous phase	concentration gaseous phase	concentration CH4 liquid phase	vol liquid phase	moles liquid phase	total moles CH4 in vial
	Partition coefficient Lomond and Thong (2011)										07-A(i)	299	301.98	0.000137114	12.6163	1.0868e-05	3.59891e-08	2	7.19783e-08	0.000137186
											07-A(i)	313	301.98	0.000148394	12.6163	1.17622e-05	3.89501e-08	2	7.79002e-08	0.000148472
											07-A(i)	334	301.98	0.00015382	12.6163	1.21922e-05	4.03742e-08	2	8.07485e-08	0.000153901
											07-A(ii)	299	301.98	0.000112567	13.88	8.10999e-06	2.6856e-08	2	5.3712e-08	0.00011262
											07-A(ii)	313	301.98	0.000124818	13.88	8.99268e-06	2.9779e-08	2	5.95581e-08	0.000124878
											07-A(ii)	334	301.98	0.000125085	13.88	9.01189e-06	2.98426e-08	2	5.96853e-08	0.000125145
											07-A(iii)	299	301.98	0.000134167	12.2873	1.09191e-05	3.61584e-08	2	7.23167e-08	0.000134239
											07-A(iii)	313	301.98	0.000145847	12.2873	1.18697e-05	3.93061e-08	2	7.86123e-08	0.000145925
											07-A(iii)	334	301.98	0.000158348	12.2873	1.28871e-05	4.26753e-08	2	8.53506e-08	0.000158433
											07-B(i)	299	301.98	0.000150271	12.6143	1.19127e-05	3.94486e-08	2	7.88972e-08	0.000150349
											07-B(i)	313	301.98	0.000155697	12.6143	1.23429e-05	4.08731e-08	2	8.17462e-08	0.000155779
											07-B(i)	334	301.98	0.000159034	12.6143	1.26074e-05	4.17492e-08	2	8.34985e-08	0.000159118
											07-B(ii)	299	301.98	0.000116532	12.83	9.08275e-06	3.00773e-08	2	6.01546e-08	0.000116592
											07-B(ii)	313	301.98	0.000123425	12.83	9.62004e-06	3.18565e-08	2	6.3713e-08	0.000123489
											07-B(ii)	334	301.98	0.000127076	12.83	9.90459e-06	3.27988e-08	2	6.55976e-08	0.000127142
											07-B(iii)	299	301.98	0.000100448	11.4973	8.73668e-06	2.89313e-08	2	5.78626e-08	0.000100506
											07-B(iii)	313	301.98	0.000108345	11.4973	9.4235e-06	3.12057e-08	2	6.24113e-08	0.000108407
											07-B(iii)	334	301.98	0.000110681	11.4973	9.62666e-06	3.18784e-08	2	6.37569e-08	0.000110744
											07-C(i)	299	301.98	2.87524e-05	13.7356	2.09328e-06	6.93184e-09	2	1.38637e-08	2.87663e-05
											07-C(i)	313	301.98	3.08656e-05	13.7356	2.24713e-06	7.44131e-09	2	1.48826e-08	3.08805e-05
											07-C(i)	334	301.98	3.28795e-05	13.7356	2.39374e-06	7.92682e-09	2	1.58536e-08	3.28953e-05
											07-C(ii)	299	301.98	2.99286e-05	13.116	2.28184e-06	7.55624e-09	2	1.51125e-08	2.99437e-05
											07-C(ii)	313	301.98	3.27788e-05	13.116	2.49915e-06	8.27586e-09	2	1.65517e-08	3.27954e-05
											07-C(ii)	334	301.98	3.51843e-05	13.116	2.68255e-06	8.88318e-09	2	1.77664e-08	3.5202e-05
											07-C(iii)	299	301.98	2.32073e-05	12.68	1.83023e-06	6.06074e-09	2	1.21215e-08	2.32194e-05
											07-C(iii)	313	301.98	2.60474e-05	12.68	2.05421e-06	6.80246e-09	2	1.36049e-08	2.6061e-05
											07-C(iii)	334	301.98	2.85792e-05	12.68	2.25388e-06	7.46366e-09	2	1.49273e-08	2.85941e-05
											08-A (i)	299	301.98	3.42531e-05	16.3895	2.08995e-06	6.9208e-09	2	1.38416e-08	3.42669e-05
											08-A (i)	313	301.98	3.88911e-05	16.3895	2.37293e-06	7.8579e-09	2	1.57158e-08	3.89068e-05
											08-A (i)	334	301.98	4.23387e-05	16.3895	2.58329e-06	8.55448e-09	2	1.7109e-08	4.23558e-05
											08-A (ii)	299	301.98	4.74594e-05	16.6311	2.85366e-06	9.44982e-09	2	1.88996e-08	4.74783e-05
											08-A (ii)	313	301.98	5.63498e-05	16.6311	3.38823e-06	1.122e-08	2	2.24401e-08	5.63723e-05
											08-A (ii)	334	301.98	6.72156e-05	16.6311	4.04157e-06	1.33836e-08	2	2.67671e-08	6.72423e-05
											08-A (iii)	299	301.98	4.39314e-05	15.78	2.784e-06	9.21913e-09	2	1.84383e-08	4.39499e-05
											08-A (iii)	313	301.98	5.2829e-05	15.78	3.34784e-06	1.10863e-08	2	2.21726e-08	5.28511e-05
	Relation 1/T and log(Kgl) = linear										08-A (iii)	334	301.98	5.89171e-05	15.78	3.73366e-06	1.23639e-08	2	2.47278e-08	5.89418e-05
	1/T (20 degrés)=	0.00341122	3.41122								08-B (i)	299	301.98	1.26161e-05	15.9	7.93468e-07	2.62755e-09	2	5.25509e-09	1.26214e-05
	Kgl (20 degrés)=	316.228									08-B (i)	313	301.98	1.55271e-05	15.9	9.76549e-07	3.23382e-09	2	6.46763e-09	1.55336e-05
	1/T (4 degres)=	0.00360815	3.60815								08-B (i)	334	301.98	1.86912e-05	15.9	1.17555e-06	3.8928e-09	2	7.7856e-09	1.8699e-05
	Kgl (4 degrés)=	334.484									08-B (ii)	299	301.98	2.89694e-05	16.2874	1.77864e-06	5.88992e-09	2	1.17798e-08	2.89811e-05
											08-B (ii)	313	301.98	3.28293e-05	16.2874	2.01563e-06	6.67471e-09	2	1.33494e-08	3.28427e-05
					Kgl	partitioning coefficient					08-B (ii)	334	301.98	3.63481e-05	16.2874	2.23168e-06	7.39014e-09	2	1.47803e-08	3.63629e-05
	Kgl=	Cg/Cl			Cg	concentration of analyte in gaseous phase					08-B (iii)	299	301.98	1.65081e-05	15.4603	1.06777e-06	3.5359e-09	2	7.0718e-09	1.65151e-05
	Cl=	Cg/Kgl			Cl	concentration of analyte in liquid phae					08-B (iii)	313	301.98	1.85219e-05	15.4603	1.19803e-06	3.96726e-09	2	7.93451e-09	1.85299e-05
											08-B (iii)	334	301.98	2.09704e-05	15.4603	1.35641e-06	4.49171e-09	2	8.98341e-09	2.09794e-05
											08-C (i)	299	301.98	3.39012e-05	15.05	2.25257e-06	7.45934e-09	2	1.49187e-08	3.39162e-05
											08-C (i)	313	301.98	3.73693e-05	15.05	2.48301e-06	8.22243e-09	2	1.64449e-08	3.73858e-05
											08-C (i)	334	301.98	4.0108e-05	15.05	2.66498e-06	8.82503e-09	2	1.76501e-08	4.01257e-05
											08-C (ii)	299	301.98	4.7275e-05	13.414	3.52429e-06	1.16706e-08	2	2.33412e-08	4.72984e-05
											08-C (ii)	313	301.98	5.06738e-05	13.414	3.77767e-06	1.25097e-08	2	2.50193e-08	5.06989e-05
											08-C (ii)	334	301.98	5.43589e-05	13.414	4.05239e-06	1.34194e-08	2	2.68388e-08	5.43857e-05
											08-C (iii)	299	301.98	3.7366e-05	14.5747	2.56375e-06	8.48978e-09	2	1.69796e-08	3.7383e-05
											08-C (iii)	313	301.98	4.04467e-05	14.5747	2.77512e-06	9.18974e-09	2	1.83795e-08	4.04651e-05
											08-C (iii)	334	301.98	4.39412e-05	14.5747	3.01488e-06	9.9837e-09	2	1.99674e-08	4.39611e-05
											09-A (i)	299	301.98	4.77468e-05	17.01	2.80698e-06	9.29525e-09	2	1.85905e-08	4.77654e-05
											09-A (i)	313	301.98	5.46171e-05	17.01	3.21088e-06	1.06328e-08	2	2.12655e-08	5.46384e-05
											09-A (i)	334	301.98	6.5889e-05	17.01	3.87354e-06	1.28271e-08	2	2.56543e-08	6.59146e-05
											09-A (ii)	299	301.98	7.35818e-05	16.0547	4.58319e-06	1.51771e-08	2	3.03542e-08	7.36122e-05
											09-A (ii)	313	301.98	8.81025e-05	16.0547	5.48764e-06	1.81722e-08	2	3.63444e-08	8.81388e-05
											09-A (ii)	334	301.98	0.000100671	16.0547	6.27047e-06	2.07645e-08	2	4.1529e-08	0.000100712
											09-B (i)	299	301.98	1.03631e-08	15.5422	6.66768e-10	2.20798e-12	2	4.41597e-12	1.03675e-08
											09-B (i)	313	301.98	2.86969e-09	15.5422	1.84638e-10	6.11424e-13	2	1.22285e-12	2.87091e-09
											09-B (i)	334	301.98	1.23615e-08	15.5422	7.95347e-10	2.63377e-12	2	5.26754e-12	1.23667e-08
											09-B (ii)	299	301.98	3.55746e-09	15.41	2.30854e-10	7.64468e-13	2	1.52894e-12	3.55899e-09
											09-B (ii)	313	301.98	2.73282e-09	15.41	1.77341e-10	5.8726e-13	2	1.17452e-12	2.734e-09
	logKgl=-(deltaH/2,303RT) + C										09-B (ii)	334	301.98	2.22618e-08	15.41	1.44464e-09	4.78387e-12	2	9.56774e-12	2.22714e-08
	logKgl=	2.47998									09-B (iii)	299	301.98	6.48794e-09	15.0417	4.31331e-10	1.42834e-12	2	2.85669e-12	6.4908e-09
	Kgl=	301.98									09-B (iii)	313	301.98	1.11771e-08	15.0417	7.43078e-10	2.46068e-12	2	4.92137e-12	1.11821e-08
											09-B (iii)	334	301.98	2.7662e-09	15.0417	1.83903e-10	6.08989e-13	2	1.21798e-12	2.76742e-09
											09-C (i)	299	301.98	2.43926e-09	15.9	1.53413e-10	5.08022e-13	2	1.01604e-12	2.44028e-09
											09-C (i)	313	301.98	1.49755e-09	15.9	9.41858e-11	3.11894e-13	2	6.23788e-13	1.49818e-09
											09-C (i)	334	301.98	2.42487e-09	15.9	1.52507e-10	5.05025e-13	2	1.01005e-12	2.42588e-09
											09-C (ii)	299	301.98	2.13199e-09	16.0174	1.33105e-10	4.40773e-13	2	8.81545e-13	2.13287e-09
											09-C (ii)	313	301.98	1.89369e-09	16.0174	1.18227e-10	3.91506e-13	2	7.83013e-13	1.89447e-09
											09-C (ii)	334	301.98	2.38931e-09	16.0174	1.4917e-10	4.93972e-13	2	9.87945e-13	2.3903e-09
											09-C (iii)	299	301.98	2.08288e-09	16.0369	1.2988e-10	4.30095e-13	2	8.6019e-13	2.08374e-09
											09-C (iii)	313	301.98	2.29153e-09	16.0369	1.42891e-10	4.73179e-13	2	9.46359e-13	2.29248e-09
											09-C (iii)	334	301.98	5.63993e-09	16.0369	3.51684e-10	1.16459e-12	2	2.32918e-12	5.64225e-09
											10A-A (i)	299	301.98	4.22502e-09	16.39	2.57781e-10	8.53634e-13	2	1.70727e-12	4.22673e-09
											10A-A (i)	313	301.98	4.20277e-09	16.39	2.56423e-10	8.49138e-13	2	1.69828e-12	4.20447e-09
											10A-A (i)	339	301.98	4.68675e-09	16.39	2.85952e-10	9.46921e-13	2	1.89384e-12	4.68864e-09
											10A-A (ii)	299	301.98	4.85835e-09	16.51	2.94267e-10	9.74458e-13	2	1.94892e-12	4.8603e-09
											10A-A (ii)	313	301.98	4.40819e-09	16.51	2.67001e-10	8.84168e-13	2	1.76834e-12	4.40996e-09
											10A-A (ii)	339	301.98	7.67698e-09	16.51	4.64989e-10	1.5398e-12	2	3.0796e-12	7.68006e-09
											10A-A(iii)	299	301.98	3.15328e-09	16.61	1.89842e-10	6.28658e-13	2	1.25732e-12	3.15454e-09
											10A-A(iii)	313	301.98	3.49623e-09	16.61	2.1049e-10	6.97031e-13	2	1.39406e-12	3.49763e-09
											10A-A(iii)	339	301.98	3.42858e-09	16.61	2.06417e-10	6.83544e-13	2	1.36709e-12	3.42995e-09
											10A-B (i)	299	301.98	4.13458e-09	15.99	2.58573e-10	8.56256e-13	2	1.71251e-12	4.13629e-09
											10A-B (i)	313	301.98	3.78814e-09	15.99	2.36907e-10	7.84511e-13	2	1.56902e-12	3.78971e-09
											10A-B (i)	339	301.98	3.76463e-09	15.99	2.35436e-10	7.79641e-13	2	1.55928e-12	3.76619e-09
											10A-B (iii)	299	301.98	2.73599e-09	17.2	1.59069e-10	5.26754e-13	2	1.05351e-12	2.73705e-09
											10A-B (iii)	313	301.98	1.95567e-09	17.2	1.13702e-10	3.76521e-13	2	7.53041e-13	1.95642e-09
											10A-B (iii)	339	301.98	2.52875e-09	17.2	1.4702e-10	4.86854e-13	2	9.73708e-13	2.52972e-09
											10A-B (iv)	299	301.98	2.77137e-09	17.41	1.59183e-10	5.27129e-13	2	1.05426e-12	2.77242e-09
											10A-B (iv)	313	301.98	2.41485e-09	17.41	1.38705e-10	4.59318e-13	2	9.18635e-13	2.41577e-09
											10A-B (iv)	339	301.98	2.32622e-09	17.41	1.33614e-10	4.42458e-13	2	8.84917e-13	2.3271e-09
											10A-C (i)	297	301.98	2.3766e-09	15.86	1.49849e-10	4.9622e-13	2	9.92441e-13	2.37759e-09
											10A-C (i)	313	301.98	2.87005e-09	15.86	1.80961e-10	5.99248e-13	2	1.1985e-12	2.87124e-09
											10A-C (i)	336	301.98	2.70586e-09	15.86	1.70609e-10	5.64968e-13	2	1.12994e-12	2.70699e-09
											10A-C(ii)	294	301.98	2.81178e-09	15.9827	1.75927e-10	5.82576e-13	2	1.16515e-12	2.81295e-09
											10A-C(ii)	313	301.98	3.41573e-09	15.9827	2.13714e-10	7.07709e-13	2	1.41542e-12	3.41714e-09
											10A-C(ii)	336	301.98	3.36781e-09	15.9827	2.10716e-10	6.97781e-13	2	1.39556e-12	3.36921e-09
											10A-C (iii)	298	301.98	2.47168e-09	16.1054	1.53469e-10	5.08209e-13	2	1.01642e-12	2.4727e-09
											10A-C (iii)	313	301.98	2.99463e-09	16.1054	1.85939e-10	6.15733e-13	2	1.23147e-12	2.99586e-09
											10A-C (iii)	336	301.98	2.74955e-09	16.1054	1.70722e-10	5.65343e-13	2	1.13069e-12	2.75068e-09
											10A-D (i)	299	301.98	2.08559e-07	16.0753	1.29739e-08	4.29629e-11	2	8.59257e-11	2.08645e-07
											10A-D (i)	313	301.98	2.22301e-07	16.0753	1.38287e-08	4.57935e-11	2	9.1587e-11	2.22392e-07
											10A-D (i)	339	301.98	2.25395e-07	16.0753	1.40212e-08	4.6431e-11	2	9.28619e-11	2.25488e-07
											10A-D (ii)	299	301.98	8.26257e-08	16.369	5.04768e-09	1.67153e-11	2	3.34305e-11	8.26592e-08
											10A-D (ii)	313	301.98	9.01816e-08	16.369	5.50928e-09	1.82438e-11	2	3.64876e-11	9.02181e-08
											10A-D (ii)	339	301.98	9.88023e-08	16.369	6.03593e-09	1.99878e-11	2	3.99756e-11	9.88423e-08
											10A-D (iii)	299	301.98	9.19793e-08	16.7518	5.49072e-09	1.81824e-11	2	3.63648e-11	9.20157e-08
											10A-D (iii)	313	301.98	1.05101e-07	16.7518	6.27402e-09	2.07763e-11	2	4.15525e-11	1.05143e-07
											10A-D (iii)	339	301.98	1.22351e-07	16.7518	7.30379e-09	2.41863e-11	2	4.83726e-11	1.224e-07
											10B-A(i)	294	301.98	1.79522e-06	14.91	1.20404e-07	3.98715e-10	2	7.9743e-10	1.79602e-06
											10B-A(i)	313	301.98	1.97076e-06	14.91	1.32177e-07	4.37701e-10	2	8.75402e-10	1.97164e-06
											10B-A(i)	334	301.98	2.25887e-06	14.91	1.515e-07	5.01688e-10	2	1.00338e-09	2.25987e-06
											10B-A(ii)	297	301.98	4.73524e-06	14.0305	3.37497e-07	1.11761e-09	2	2.23523e-09	4.73748e-06
											10B-A(ii)	313	301.98	5.41989e-06	14.0305	3.86295e-07	1.2792e-09	2	2.55841e-09	5.42245e-06
											10B-A(ii)	334	301.98	5.97723e-06	14.0305	4.26018e-07	1.41075e-09	2	2.82149e-09	5.98005e-06
											10B-A (iii)	297	301.98	3.29744e-06	13.3745	2.46546e-07	8.16432e-10	2	1.63286e-09	3.29908e-06
											10B-A (iii)	313	301.98	3.55463e-06	13.3745	2.65776e-07	8.8011e-10	2	1.76022e-09	3.55639e-06
											10B-A (iii)	334	301.98	3.79354e-06	13.3745	2.83639e-07	9.39262e-10	2	1.87852e-09	3.79542e-06
											10B-B (i)	297	301.98	1.57145e-05	13.5212	1.16221e-06	3.84862e-09	2	7.69724e-09	1.57221e-05
											10B-B (i)	313	301.98	1.81546e-05	13.5212	1.34267e-06	4.44623e-09	2	8.89246e-09	1.81635e-05
											10B-B (i)	334	301.98	2.04129e-05	13.5212	1.5097e-06	4.99932e-09	2	9.99865e-09	2.04229e-05
											10B-B (ii)	297	301.98	2.12286e-05	15.27	1.39021e-06	4.60366e-09	2	9.20731e-09	2.12378e-05
											10B-B (ii)	313	301.98	2.27161e-05	15.27	1.48763e-06	4.92625e-09	2	9.8525e-09	2.2726e-05
											10B-B (ii)	334	301.98	2.39058e-05	15.27	1.56554e-06	5.18425e-09	2	1.03685e-08	2.39162e-05
											10B-B (iii)	297	301.98	1.71653e-05	15.6525	1.09664e-06	3.63151e-09	2	7.26301e-09	1.71725e-05
											10B-B (iii)	313	301.98	1.92762e-05	15.6525	1.23151e-06	4.0781e-09	2	8.1562e-09	1.92844e-05
											10B-B (iii)	334	301.98	2.20516e-05	15.6525	1.40882e-06	4.66527e-09	2	9.33055e-09	2.2061e-05
											10B-C(i)	294	301.98	1.27115e-05	14.14	8.98972e-07	2.97692e-09	2	5.95384e-09	1.27174e-05
											10B-C(i)	313	301.98	1.33126e-05	14.14	9.41485e-07	3.1177e-09	2	6.23541e-09	1.33188e-05
											10B-C(i)	334	301.98	1.45866e-05	14.14	1.03158e-06	3.41607e-09	2	6.83213e-09	1.45934e-05
											10B-C (ii)	297	301.98	7.7752e-06	15.2467	5.09959e-07	1.68871e-09	2	3.37743e-09	7.77857e-06
											10B-C (ii)	313	301.98	8.31683e-06	15.2467	5.45483e-07	1.80635e-09	2	3.61271e-09	8.32044e-06
											10B-C (ii)	334	301.98	8.92827e-06	15.2467	5.85586e-07	1.93915e-09	2	3.87831e-09	8.93214e-06
											10B-C (iii)	297	301.98	1.01587e-05	13.4265	7.56618e-07	2.50552e-09	2	5.01104e-09	1.01637e-05
											10B-C (iii)	313	301.98	1.09302e-05	13.4265	8.1408e-07	2.69581e-09	2	5.39161e-09	1.09356e-05
											10B-C (iii)	334	301.98	1.16355e-05	13.4265	8.66613e-07	2.86977e-09	2	5.73953e-09	1.16413e-05
											10C-A (i)	297	301.98	1.57333e-05	13.6829	1.14985e-06	3.80771e-09	2	7.61542e-09	1.57409e-05
											10C-A (i)	313	301.98	1.73272e-05	13.6829	1.26634e-06	4.19345e-09	2	8.3869e-09	1.73356e-05
											10C-A (i)	336	301.98	1.78653e-05	13.6829	1.30567e-06	4.32368e-09	2	8.64736e-09	1.78739e-05
											10C-A (ii)	298	301.98	1.40612e-05	14.6391	9.60527e-07	3.18076e-09	2	6.36152e-09	1.40676e-05
											10C-A (ii)	313	301.98	1.51002e-05	14.6391	1.0315e-06	3.41579e-09	2	6.83158e-09	1.51071e-05
											10C-A (ii)	336	301.98	1.67931e-05	14.6391	1.14714e-06	3.79872e-09	2	7.59744e-09	1.68007e-05
											10C-A (iii)	297	301.98	9.00051e-06	14.29	6.29847e-07	2.08572e-09	2	4.17144e-09	9.00468e-06
											10C-A (iii)	313	301.98	9.64897e-06	14.29	6.75225e-07	2.23599e-09	2	4.47198e-09	9.65344e-06
											10C-A (iii)	336	301.98	1.07318e-05	14.29	7.51001e-07	2.48692e-09	2	4.97384e-09	1.07368e-05
											10C-B (i)	297	301.98	5.31824e-06	14.76	3.60315e-07	1.19317e-09	2	2.38634e-09	5.32063e-06
											10C-B (i)	313	301.98	5.85172e-06	14.76	3.96458e-07	1.31286e-09	2	2.62572e-09	5.85435e-06
											10C-B (i)	336	301.98	6.50364e-06	14.76	4.40626e-07	1.45912e-09	2	2.91824e-09	6.50656e-06
											10C-B (ii)	297	301.98	1.98975e-06	13.5057	1.47327e-07	4.87868e-10	2	9.75737e-10	1.99073e-06
											10C-B (ii)	313	301.98	2.21456e-06	13.5057	1.63972e-07	5.42989e-10	2	1.08598e-09	2.21564e-06
											10C-B (ii)	336	301.98	2.47282e-06	13.5057	1.83095e-07	6.06313e-10	2	1.21263e-09	2.47403e-06
											10C-B (iii)	297	301.98	4.77044e-06	14.6542	3.25533e-07	1.078e-09	2	2.15599e-09	4.77259e-06
											10C-B (iii)	313	301.98	5.24981e-06	14.6542	3.58246e-07	1.18632e-09	2	2.37264e-09	5.25218e-06
											10C-B (iii)	336	301.98	5.77791e-06	14.6542	3.94283e-07	1.30566e-09	2	2.61132e-09	5.78052e-06
											10C-C (i)	297	301.98	3.56093e-07	13.0299	2.73289e-08	9.04989e-11	2	1.80998e-10	3.56274e-07
											10C-C (i)	313	301.98	3.52339e-07	13.0299	2.70407e-08	8.95446e-11	2	1.79089e-10	3.52518e-07
											10C-C (i)	336	301.98	3.5642e-07	13.0299	2.7354e-08	9.0582e-11	2	1.81164e-10	3.56602e-07
											10C-C (ii)	297	301.98	2.51369e-07	12.5018	2.01067e-08	6.65827e-11	2	1.33165e-10	2.51502e-07
											10C-C (ii)	313	301.98	2.47237e-07	12.5018	1.97762e-08	6.54883e-11	2	1.30977e-10	2.47368e-07
											10C-C (ii)	336	301.98	2.42871e-07	12.5018	1.94269e-08	6.43318e-11	2	1.28664e-10	2.43e-07
											10C-C (iii)	297	301.98	5.46277e-09	16.4795	3.31489e-10	1.09772e-12	2	2.19543e-12	5.46496e-09
											10C-C (iii)	313	301.98	7.06981e-08	16.4795	4.29007e-09	1.42064e-11	2	2.84129e-11	7.07265e-08
											10C-C (iii)	336	301.98	7.04212e-08	16.4795	4.27326e-09	1.41508e-11	2	2.83016e-11	7.04495e-08
											10D-A (i)	297	301.98	3.4867e-07	14.99	2.32602e-08	7.70254e-11	2	1.54051e-10	3.48824e-07
											10D-A (i)	313	301.98	3.72177e-07	14.99	2.48283e-08	8.22184e-11	2	1.64437e-10	3.72341e-07
											10D-A (i)	336	301.98	3.67489e-07	14.99	2.45156e-08	8.11829e-11	2	1.62366e-10	3.67652e-07
											10D-A (ii)	297	301.98	2.48378e-07	14.7243	1.68685e-08	5.58597e-11	2	1.11719e-10	2.48489e-07
											10D-A (ii)	313	301.98	2.75362e-07	14.7243	1.87012e-08	6.19284e-11	2	1.23857e-10	2.75486e-07
											10D-A (ii)	336	301.98	3.01188e-07	14.7243	2.04551e-08	6.77366e-11	2	1.35473e-10	3.01323e-07
											10D-A (iii)	298	301.98	2.68102e-07	15.5938	1.71928e-08	5.69335e-11	2	1.13867e-10	2.68216e-07
											10D-A (iii)	313	301.98	2.94914e-07	15.5938	1.89122e-08	6.26272e-11	2	1.25254e-10	2.95039e-07
											10D-A (iii)	336	301.98	3.24443e-07	15.5938	2.08058e-08	6.8898e-11	2	1.37796e-10	3.24581e-07
											10D-B (i)	297	301.98	8.70574e-07	12.7822	6.81085e-08	2.25539e-10	2	4.51079e-10	8.71025e-07
											10D-B (i)	313	301.98	9.876e-07	12.7822	7.72638e-08	2.55857e-10	2	5.11714e-10	9.88112e-07
											10D-B (i)	336	301.98	1.14698e-06	12.7822	8.9733e-08	2.97148e-10	2	5.94297e-10	1.14758e-06
											10D-B (ii)	297	301.98	8.24217e-07	13.72	6.00741e-08	1.98934e-10	2	3.97868e-10	8.24615e-07
											10D-B (ii)	313	301.98	9.41334e-07	13.72	6.86104e-08	2.27201e-10	2	4.54403e-10	9.41789e-07
											10D-B (ii)	336	301.98	1.06162e-06	13.72	7.73776e-08	2.56234e-10	2	5.12468e-10	1.06213e-06
											10D-B (iii)	297	301.98	3.33105e-07	15.3165	2.17481e-08	7.20183e-11	2	1.44037e-10	3.3325e-07
											10D-B (iii)	313	301.98	3.81197e-07	15.3165	2.4888e-08	8.24158e-11	2	1.64832e-10	3.81362e-07
											10D-B (iii)	336	301.98	4.37111e-07	15.3165	2.85385e-08	9.45046e-11	2	1.89009e-10	4.373e-07
											10D-C (ii)	297	301.98	4.12588e-07	14.1148	2.92309e-08	9.67972e-11	2	1.93594e-10	4.12781e-07
											10D-C (ii)	313	301.98	4.49293e-07	14.1148	3.18314e-08	1.05409e-10	2	2.10817e-10	4.49504e-07
											10D-C (ii)	336	301.98	4.78432e-07	14.1148	3.38958e-08	1.12245e-10	2	2.2449e-10	4.78657e-07
											10D-C (iii)	297	301.98	8.86173e-07	14.93	5.93552e-08	1.96553e-10	2	3.93106e-10	8.86566e-07
											10D-C (iii)	313	301.98	9.53313e-07	14.93	6.38522e-08	2.11445e-10	2	4.22889e-10	9.53736e-07
											10D-C (iii)	336	301.98	1.0821e-06	14.93	7.24786e-08	2.40011e-10	2	4.80022e-10	1.08258e-06

## Sheet: CH4 production rates
Échantillion	Days	CH4 (ppm)	CO2 (ppm)	Weight sed (g)	Wet sediment density (g/cc)	Volume sediment	Volume headspace	moles in each vials (gaseous)	moles CH4 gaseous	Total CH4 moles in vials	Sample	CH4 nmol/cm-3/d-1			Sample	Mean CH4 nmol/cm-3/d-1	Std dev
07-A(i)	299	247015	154239	6.37	1.15529	5.51375	12.6163	0.000555082	0.000137114	0.000137186	07-A(i)	83.4801			07-A(i)	92.7624	21.2006		P	101.325	kPa
07-A(i)	313	267338	149642	6.37	1.15529	5.51375	12.6163	0.000555082	0.000148394	0.000148472	07-A(ii)	77.7861			07-B(i)	47.0095	6.98079		R	8.314	Ideal gas law
07-A(i)	334	277113	144941	6.37	1.15529	5.51375	12.6163	0.000555082	0.00015382	0.000153901	07-A(iii)	117.021			07-C(i)	27.8509	1.48204		T	277	K
07-A(ii)	299	184329	118840	4.91	1.15529	4.25	13.88	0.000610684	0.000112567	0.00011262					08-A (i)	227.206	129.569
07-A(ii)	313	204391	117527	4.91	1.15529	4.25	13.88	0.000610684	0.000124818	0.000124878					08-B (i)	79.0392	32.621
07-A(ii)	334	204828	119235	4.91	1.15529	4.25	13.88	0.000610684	0.000125085	0.000125145					08-C (i)	50.4248	7.16041
07-A(iii)	299	248177	158221	6.75	1.15529	5.84267	12.2873	0.00054061	0.000134167	0.000134239					09-A(i)	415.353	69.2063
07-A(iii)	313	269782	156525	6.75	1.15529	5.84267	12.2873	0.00054061	0.000145847	0.000145925					09-B (i)	0.0667334	0.128157
07-A(iii)	334	292906	147112	6.75	1.15529	5.84267	12.2873	0.00054061	0.000158348	0.000158433					09-C (i)	0.0187467	0.0277546
07-B(i)	299	270760	158727	7.16	1.29811	5.5157	12.6143	0.000554996	0.000150271	0.000150349	07-B(i)	44.1097			10A-A (i)	0.0195711	0.0245249
07-B(i)	313	280537	157750	7.16	1.29811	5.5157	12.6143	0.000554996	0.000155697	0.000155779	07-B(ii)	54.9728			10A-B (i)	-0.0066058	0.00657083
07-B(i)	334	286550	145820	7.16	1.29811	5.5157	12.6143	0.000554996	0.000159034	0.000159118	07-B(iii)	41.9459			10A-C (i)	0.0040106	0.00166434
07-B(ii)	299	206438	117256	6.88	1.29811	5.3	12.83	0.000564486	0.000116532	0.000116592					10A-D (i)	0.317755	0.195452
07-B(ii)	313	218650	113405	6.88	1.29811	5.3	12.83	0.000564486	0.000123425	0.000123489					10B-A (iii)	4.83891	2.85739
07-B(ii)	334	225118	117260	6.88	1.29811	5.3	12.83	0.000564486	0.000127076	0.000127142					10B-B (i)	35.2383	15.7117
07-B(iii)	299	198573	132878	8.61	1.29811	6.6327	11.4973	0.000505851	0.000100448	0.000100506					10B-C (ii)	10.338	1.73866
07-B(iii)	313	214183	128684	8.61	1.29811	6.6327	11.4973	0.000505851	0.000108345	0.000108407					10C-A (i)	14.6886	5.1583
07-B(iii)	334	218801	132186	8.61	1.29811	6.6327	11.4973	0.000505851	0.000110681	0.000110744					10C-B (i)	6.34031	3.28448
07-C(i)	299	47577.4	40665.5	7.66	1.74312	4.39442	13.7356	0.000604329	2.87524e-05	2.87663e-05	07-C(i)	26.4503			10C-C (i)	0.301377	0.220818
07-C(i)	313	51074.2	41680	7.66	1.74312	4.39442	13.7356	0.000604329	3.08656e-05	3.08805e-05	07-C(ii)	29.4027			10D-A (i)	0.369938	0.220818
07-C(i)	334	54406.5	39817.1	7.66	1.74312	4.39442	13.7356	0.000604329	3.28795e-05	3.28953e-05	07-C(iii)	27.6996			10D-B (i)	1.21125	0.23382
07-C(ii)	299	51863	44487.5	8.74	1.74312	5.014	13.116	0.00057707	2.99286e-05	2.99437e-05					10D-C (ii)	0.998291	0.827234
07-C(ii)	313	56802.2	50654	8.74	1.74312	5.014	13.116	0.00057707	3.27788e-05	3.27954e-05
07-C(ii)	334	60970.6	43518.4	8.74	1.74312	5.014	13.116	0.00057707	3.51843e-05	3.5202e-05
07-C(iii)	299	41598.5	44922.4	9.5	1.74312	5.45	12.68	0.000557887	2.32073e-05	2.32194e-05
07-C(iii)	313	46689.4	46495.5	9.5	1.74312	5.45	12.68	0.000557887	2.60474e-05	2.6061e-05
07-C(iii)	334	51227.6	43293.5	9.5	1.74312	5.45	12.68	0.000557887	2.85792e-05	2.85941e-05
08-A (i)	299	47501.6	8781.65	3.17	1.82128	1.74054	16.3895	0.000721093	3.42531e-05	3.42669e-05	08-A (i)	129.748
08-A (i)	313	53933.5	8781.65	3.17	1.82128	1.74054	16.3895	0.000721093	3.88911e-05	3.89068e-05	08-A (ii)	374.244
08-A (i)	334	58714.5	8781.65	3.17	1.82128	1.74054	16.3895	0.000721093	4.23387e-05	4.23558e-05	08-A (iii)	177.626
08-A (ii)	299	64859.8	45447.8	2.73	1.82128	1.49895	16.6311	0.000731723	4.74594e-05	4.74783e-05
08-A (ii)	313	77009.8	48572.9	2.73	1.82128	1.49895	16.6311	0.000731723	5.63498e-05	5.63723e-05
08-A (ii)	334	91859.4	50127.8	2.73	1.82128	1.49895	16.6311	0.000731723	6.72156e-05	6.72423e-05
08-A (iii)	299	63276.4	35161	4.28	1.82128	2.35	15.78	0.000694279	4.39314e-05	4.39499e-05
08-A (iii)	313	76091.9	37362	4.28	1.82128	2.35	15.78	0.000694279	5.2829e-05	5.28511e-05
08-A (iii)	334	84860.9	40990.5	4.28	1.82128	2.35	15.78	0.000694279	5.89171e-05	5.89418e-05
08-B (i)	299	18034.4	44299.7	2.13	0.955157	2.23	15.9	0.000699558	1.26161e-05	1.26214e-05	08-B (i)	77.0572
08-B (i)	313	22195.6	41918.8	2.13	0.955157	2.23	15.9	0.000699558	1.55271e-05	1.55336e-05	08-B (ii)	112.606
08-B (i)	334	26718.6	48437.8	2.13	0.955157	2.23	15.9	0.000699558	1.86912e-05	1.8699e-05	08-B (iii)	47.4544
08-B (ii)	299	40426	56624	1.76	0.955157	1.84263	16.2874	0.000716602	2.89694e-05	2.89811e-05
08-B (ii)	313	45812.5	60879.6	1.76	0.955157	1.84263	16.2874	0.000716602	3.28293e-05	3.28427e-05
08-B (ii)	334	50722.9	57622.8	1.76	0.955157	1.84263	16.2874	0.000716602	3.63481e-05	3.63629e-05
08-B (iii)	299	24269	54132	2.55	0.955157	2.66972	15.4603	0.000680212	1.65081e-05	1.65151e-05
08-B (iii)	313	27229.7	53822.1	2.55	0.955157	2.66972	15.4603	0.000680212	1.85219e-05	1.85299e-05
08-B (iii)	334	30829.3	56428.9	2.55	0.955157	2.66972	15.4603	0.000680212	2.09704e-05	2.09794e-05
08-C (i)	299	51197.9	41977.3	3.37	1.09416	3.08	15.05	0.000662161	3.39012e-05	3.39162e-05	08-C (i)	56.3989
08-C (i)	313	56435.5	44349.2	3.37	1.09416	3.08	15.05	0.000662161	3.73693e-05	3.73858e-05	08-C (ii)	42.4876
08-C (i)	334	60571.4	44158.2	3.37	1.09416	3.08	15.05	0.000662161	4.0108e-05	4.01257e-05	08-C (iii)	52.388
08-C (ii)	299	80102.4	60041.4	5.16	1.09416	4.71596	13.414	0.000590182	4.7275e-05	4.72984e-05
08-C (ii)	313	85861.3	61633.1	5.16	1.09416	4.71596	13.414	0.000590182	5.06738e-05	5.06989e-05
08-C (ii)	334	92105.2	62701	5.16	1.09416	4.71596	13.414	0.000590182	5.43589e-05	5.43857e-05
08-C (iii)	299	58270.5	47141.9	3.89	1.09416	3.55525	14.5747	0.000641251	3.7366e-05	3.7383e-05
08-C (iii)	313	63074.7	51493.5	3.89	1.09416	3.55525	14.5747	0.000641251	4.04467e-05	4.04651e-05
08-C (iii)	334	68524.1	49138.8	3.89	1.09416	3.55525	14.5747	0.000641251	4.39412e-05	4.39611e-05
09-A (i)	299	63798.9	57237	1.7	1.51786	1.12	17.01	0.000748395	4.77468e-05	4.77654e-05	09-A (i)	464.289
09-A (i)	313	72979	59734.1	1.7	1.51786	1.12	17.01	0.000748395	5.46171e-05	5.46384e-05	09-A (ii)	366.417
09-A (i)	334	88040.3	64441.8	1.7	1.51786	1.12	17.01	0.000748395	6.5889e-05	6.59146e-05
09-A (ii)	299	104170	74268.1	3.15	1.51786	2.07529	16.0547	0.000706365	7.35818e-05	7.36122e-05
09-A (ii)	313	124727	78739.1	3.15	1.51786	2.07529	16.0547	0.000706365	8.81025e-05	8.81388e-05
09-A (ii)	334	142519	79065	3.15	1.51786	2.07529	16.0547	0.000706365	0.000100671	0.000100712
09-B (i)	299	15.1547	45723.9	2.74	1.05882	2.58778	15.5422	0.000683817	1.03631e-08	1.03675e-08	09-B (i)	0.034126
09-B (i)	313	4.19657	48679.6	2.74	1.05882	2.58778	15.5422	0.000683817	2.86969e-09	2.87091e-09	09-B (ii)	0.208044
09-B (i)	334	18.0771	47975.9	2.74	1.05882	2.58778	15.5422	0.000683817	1.23615e-08	1.23667e-08	09-B (iii)	-0.0419701
09-B (ii)	299	5.247	50751.8	2.88	1.05882	2.72	15.41	0.000678	3.55746e-09	3.55899e-09
09-B (ii)	313	4.03071	53829.9	2.88	1.05882	2.72	15.41	0.000678	2.73282e-09	2.734e-09
09-B (ii)	334	32.8346	55438	2.88	1.05882	2.72	15.41	0.000678	2.22618e-08	2.22714e-08
09-B (iii)	299	9.80357	46606.7	3.27	1.05882	3.08833	15.0417	0.000661794	6.48794e-09	6.4908e-09
09-B (iii)	313	16.8891	50987.6	3.27	1.05882	3.08833	15.0417	0.000661794	1.11771e-08	1.11821e-08
09-B (iii)	334	4.17986	52476.4	3.27	1.05882	3.08833	15.0417	0.000661794	2.7662e-09	2.76742e-09
09-C (i)	299	3.48686	15300.3	2.28	1.02242	2.23	15.9	0.000699558	2.43926e-09	2.44028e-09	09-C (i)	0.00139405
09-C (i)	313	2.14071	16161.5	2.28	1.02242	2.23	15.9	0.000699558	1.49755e-09	1.49818e-09	09-C (ii)	0.00408898
09-C (i)	334	3.46629	18247.7	2.28	1.02242	2.23	15.9	0.000699558	2.42487e-09	2.42588e-09	09-C (iii)	0.0507571
09-C (ii)	299	3.02529	17101.7	2.16	1.02242	2.11263	16.0174	0.000704722	2.13199e-09	2.13287e-09
09-C (ii)	313	2.68714	19101.9	2.16	1.02242	2.11263	16.0174	0.000704722	1.89369e-09	1.89447e-09
09-C (ii)	334	3.39043	20051.8	2.16	1.02242	2.11263	16.0174	0.000704722	2.38931e-09	2.3903e-09
09-C (iii)	299	2.952	15159.8	2.14	1.02242	2.09307	16.0369	0.000705583	2.08288e-09	2.08374e-09
09-C (iii)	313	3.24771	16147	2.14	1.02242	2.09307	16.0369	0.000705583	2.29153e-09	2.29248e-09
09-C (iii)	334	7.99329	16883.5	2.14	1.02242	2.09307	16.0369	0.000705583	5.63993e-09	5.64225e-09
10A-A (i)	299	5.859	70872.3	1.74	1	1.74	16.39	0.000721117	4.22502e-09	4.22673e-09	10A-A (i)	0.00714974
10A-A (i)	313	5.82814	70510.8	1.74	1	1.74	16.39	0.000721117	4.20277e-09	4.20447e-09	10A-A (ii)	0.0478215
10A-A (i)	339	6.49929	67096.4	1.74	1	1.74	16.39	0.000721117	4.68675e-09	4.68864e-09	10A-A(iii)	0.00374193
10A-A (ii)	299	6.68829	46443.5	1.62	1	1.62	16.51	0.000726397	4.85835e-09	4.8603e-09
10A-A (ii)	313	6.06857	46575.6	1.62	1	1.62	16.51	0.000726397	4.40819e-09	4.40996e-09
10A-A (ii)	339	10.5686	45685.3	1.62	1	1.62	16.51	0.000726397	7.67698e-09	7.68006e-09
10A-A(iii)	299	4.31486	34806.5	1.52	1	1.52	16.61	0.000730796	3.15328e-09	3.15454e-09
10A-A(iii)	313	4.78414	34925.7	1.52	1	1.52	16.61	0.000730796	3.49623e-09	3.49763e-09
10A-A(iii)	339	4.69157	33828.4	1.52	1	1.52	16.61	0.000730796	3.42858e-09	3.42995e-09
10A-B (i)	299	5.877	59218.2	2.14	1	2.14	15.99	0.000703518	4.13458e-09	4.13629e-09	10A-B (i)	-0.0038313
10A-B (i)	313	5.38457	62416.7	2.14	1	2.14	15.99	0.000703518	3.78814e-09	3.78971e-09	10A-B (iii)	-0.00187729
10A-B (i)	339	5.35114	61220.7	2.14	1	2.14	15.99	0.000703518	3.76463e-09	3.76619e-09	10A-B (iv)	-0.0141088
10A-B (iii)	299	3.61543	36665	0.93	1	0.93	17.2	0.000756755	2.73599e-09	2.73705e-09
10A-B (iii)	313	2.58429	38517.3	0.93	1	0.93	17.2	0.000756755	1.95567e-09	1.95642e-09
10A-B (iii)	339	3.34157	38645.8	0.93	1	0.93	17.2	0.000756755	2.52875e-09	2.52972e-09
10A-B (iv)	299	3.618	34584.9	0.72	1	0.72	17.41	0.000765994	2.77137e-09	2.77242e-09
10A-B (iv)	313	3.15257	35344	0.72	1	0.72	17.41	0.000765994	2.41485e-09	2.41577e-09
10A-B (iv)	339	3.03686	35061.9	0.72	1	0.72	17.41	0.000765994	2.32622e-09	2.3271e-09
10A-C (i)	297	3.40586	24518.3	1.85	0.814978	2.27	15.86	0.000697798	2.3766e-09	2.37759e-09	10A-C (i)	0.00324134
10A-C (i)	313	4.113	24247.2	1.85	0.814978	2.27	15.86	0.000697798	2.87005e-09	2.87124e-09	10A-C(ii)	0.00592041
10A-C (i)	336	3.87771	24034.8	1.85	0.814978	2.27	15.86	0.000697798	2.70586e-09	2.70699e-09	10A-C (iii)	0.00287003
10A-C(ii)	294	3.99857	11903.3	1.75	0.814978	2.1473	15.9827	0.000703197	2.81178e-09	2.81295e-09
10A-C(ii)	313	4.85743	11655.1	1.75	0.814978	2.1473	15.9827	0.000703197	3.41573e-09	3.41714e-09
10A-C(ii)	336	4.78929	11626	1.75	0.814978	2.1473	15.9827	0.000703197	3.36781e-09	3.36921e-09
10A-C (iii)	298	3.48814	22180.6	1.65	0.814978	2.02459	16.1054	0.000708596	2.47168e-09	2.4727e-09
10A-C (iii)	313	4.22614	23214.9	1.65	0.814978	2.02459	16.1054	0.000708596	2.99463e-09	2.99586e-09
10A-C (iii)	336	3.88029	22364.9	1.65	0.814978	2.02459	16.1054	0.000708596	2.74955e-09	2.75068e-09
10A-D (i)	299	294.88	26539.9	3.932	1.91362	2.05474	16.0753	0.000707269	2.08559e-07	2.08645e-07	10A-D (i)	0.186373
10A-D (i)	313	314.308	27425.2	3.932	1.91362	2.05474	16.0753	0.000707269	2.22301e-07	2.22392e-07	10A-D (ii)	0.224526
10A-D (i)	339	318.684	26132.8	3.932	1.91362	2.05474	16.0753	0.000707269	2.25395e-07	2.25488e-07	10A-D (iii)	0.542366
10A-D (ii)	299	114.727	10174.3	3.3698	1.91362	1.76095	16.369	0.000720195	8.26257e-08	8.26592e-08
10A-D (ii)	313	125.218	22132.5	3.3698	1.91362	1.76095	16.369	0.000720195	9.01816e-08	9.02181e-08
10A-D (ii)	339	137.188	22185.8	3.3698	1.91362	1.76095	16.369	0.000720195	9.88023e-08	9.88423e-08
10A-D (iii)	299	124.797	27287.2	2.6374	1.91362	1.37822	16.7518	0.000737034	9.19793e-08	9.20157e-08
10A-D (iii)	313	142.6	28447.8	2.6374	1.91362	1.37822	16.7518	0.000737034	1.05101e-07	1.05143e-07
10A-D (iii)	339	166.005	28258.2	2.6374	1.91362	1.37822	16.7518	0.000737034	1.22351e-07	1.224e-07
10B-A(i)	294	2736.62	29044.1	2.16	0.670807	3.22	14.91	0.000656001	1.79522e-06	1.79602e-06	10B-A(i)	3.61286
10B-A(i)	313	3004.21	30441	2.16	0.670807	3.22	14.91	0.000656001	1.97076e-06	1.97164e-06	10B-A(ii)	8.10472
10B-A(i)	334	3443.39	30466.4	2.16	0.670807	3.22	14.91	0.000656001	2.25887e-06	2.25987e-06	10B-A (iii)	2.79915
10B-A(ii)	297	7670.85	53111	2.75	0.670807	4.09954	14.0305	0.000617304	4.73524e-06	4.73748e-06
10B-A(ii)	313	8779.94	57258.6	2.75	0.670807	4.09954	14.0305	0.000617304	5.41989e-06	5.42245e-06
10B-A(ii)	334	9682.8	57548.6	2.75	0.670807	4.09954	14.0305	0.000617304	5.97723e-06	5.98005e-06
10B-A (iii)	297	5603.66	39903.6	3.19	0.670807	4.75546	13.3745	0.000588445	3.29744e-06	3.29908e-06
10B-A (iii)	313	6040.72	41028.4	3.19	0.670807	4.75546	13.3745	0.000588445	3.55463e-06	3.55639e-06
10B-A (iii)	334	6446.72	40052.1	3.19	0.670807	4.75546	13.3745	0.000588445	3.79354e-06	3.79542e-06
10B-B (i)	297	26415.4	24805	2.53	0.548951	4.60879	13.5212	0.000594898	1.57145e-05	1.57221e-05	10B-B (i)	27.352
10B-B (i)	313	30517.2	27604.1	2.53	0.548951	4.60879	13.5212	0.000594898	1.81546e-05	1.81635e-05	10B-B (ii)	25.0319
10B-B (i)	334	34313.4	28601.9	2.53	0.548951	4.60879	13.5212	0.000594898	2.04129e-05	2.04229e-05	10B-B (iii)	53.3311
10B-B (ii)	297	31597.7	31786.4	1.57	0.548951	2.86	15.27	0.00067184	2.12286e-05	2.12378e-05
10B-B (ii)	313	33811.8	32961.3	1.57	0.548951	2.86	15.27	0.00067184	2.27161e-05	2.2726e-05
10B-B (ii)	334	35582.6	34953.9	1.57	0.548951	2.86	15.27	0.00067184	2.39058e-05	2.39162e-05
10B-B (iii)	297	24925.2	42277.6	1.36	0.548951	2.47745	15.6525	0.000688671	1.71653e-05	1.71725e-05
10B-B (iii)	313	27990.4	46045.2	1.36	0.548951	2.47745	15.6525	0.000688671	1.92762e-05	1.92844e-05
10B-B (iii)	334	32020.6	46846.9	1.36	0.548951	2.47745	15.6525	0.000688671	2.20516e-05	2.2061e-05
10B-C(i)	294	20432.4	23230.3	2.74	0.686717	3.99	14.14	0.000622123	1.27115e-05	1.27174e-05	10B-C(i)	11.815
10B-C(i)	313	21398.7	23729.1	2.74	0.686717	3.99	14.14	0.000622123	1.33126e-05	1.33188e-05	10B-C (ii)	10.7771
10B-C(i)	334	23446.5	24262.6	2.74	0.686717	3.99	14.14	0.000622123	1.45866e-05	1.45934e-05	10B-C (iii)	8.42189
10B-C (ii)	297	11590.7	14759.8	1.98	0.686717	2.88328	15.2467	0.000670816	7.7752e-06	7.77857e-06
10B-C (ii)	313	12398.1	15218.7	1.98	0.686717	2.88328	15.2467	0.000670816	8.31683e-06	8.32044e-06
10B-C (ii)	334	13309.6	15437.7	1.98	0.686717	2.88328	15.2467	0.000670816	8.92827e-06	8.93214e-06
10B-C (iii)	297	17196.9	20372.1	3.23	0.686717	4.70354	13.4265	0.000590729	1.01587e-05	1.01637e-05
10B-C (iii)	313	18502.9	21433.5	3.23	0.686717	4.70354	13.4265	0.000590729	1.09302e-05	1.09356e-05
10B-C (iii)	334	19696.9	21719.5	3.23	0.686717	4.70354	13.4265	0.000590729	1.16355e-05	1.16413e-05
10C-A (i)	297	26134.6	28046.6	2.93	0.658854	4.44711	13.6829	0.000602011	1.57333e-05	1.57409e-05	10C-A (i)	11.8072
10C-A (i)	313	28782.2	30153.2	2.93	0.658854	4.44711	13.6829	0.000602011	1.73272e-05	1.73356e-05	10C-A (ii)	20.6439
10C-A (i)	336	29676	29320.3	2.93	0.658854	4.44711	13.6829	0.000602011	1.78653e-05	1.78739e-05	10C-A (iii)	11.6148
10C-A (ii)	298	21831.4	23742.3	2.3	0.658854	3.49091	14.6391	0.000644082	1.40612e-05	1.40676e-05
10C-A (ii)	313	23444.6	24757.1	2.3	0.658854	3.49091	14.6391	0.000644082	1.51002e-05	1.51071e-05
10C-A (ii)	336	26072.9	24898.2	2.3	0.658854	3.49091	14.6391	0.000644082	1.67931e-05	1.68007e-05
10C-A (iii)	297	14315.5	17138.4	2.53	0.658854	3.84	14.29	0.000628723	9.00051e-06	9.00468e-06
10C-A (iii)	313	15346.9	17723.6	2.53	0.658854	3.84	14.29	0.000628723	9.64897e-06	9.65344e-06
10C-A (iii)	336	17069.2	18408.5	2.53	0.658854	3.84	14.29	0.000628723	1.07318e-05	1.07368e-05
10C-B (i)	297	8189.46	12110.8	2.23	0.661721	3.37	14.76	0.000649401	5.31824e-06	5.32063e-06	10C-B (i)	8.98076
10C-B (i)	313	9010.95	12562.2	2.23	0.661721	3.37	14.76	0.000649401	5.85172e-06	5.85435e-06	10C-B (ii)	2.66237
10C-B (i)	336	10014.8	13079.4	2.23	0.661721	3.37	14.76	0.000649401	6.50364e-06	6.50656e-06	10C-B (iii)	7.37781
10C-B (ii)	297	3348.53	8907.33	3.06	0.661721	4.6243	13.5057	0.000594215	1.98975e-06	1.99073e-06
10C-B (ii)	313	3726.86	9156.11	3.06	0.661721	4.6243	13.5057	0.000594215	2.21456e-06	2.21564e-06
10C-B (ii)	336	4161.49	9549.73	3.06	0.661721	4.6243	13.5057	0.000594215	2.47282e-06	2.47403e-06
10C-B (iii)	297	7398.93	11451.5	2.3	0.661721	3.47578	14.6542	0.000644747	4.77044e-06	4.77259e-06
10C-B (iii)	313	8142.43	11873.6	2.3	0.661721	3.47578	14.6542	0.000644747	5.24981e-06	5.25218e-06
10C-B (iii)	336	8961.51	12161.9	2.3	0.661721	3.47578	14.6542	0.000644747	5.77791e-06	5.78052e-06
10C-C (i)	297	621.148	5192.13	3.09	0.605873	5.10008	13.0299	0.000573283	3.56093e-07	3.56274e-07	10C-C (i)	0.00396204
10C-C (i)	313	614.598	5274.51	3.09	0.605873	5.10008	13.0299	0.000573283	3.52339e-07	3.52518e-07	10C-C (ii)	-0.0383861
10C-C (i)	336	621.719	5404.33	3.09	0.605873	5.10008	13.0299	0.000573283	3.5642e-07	3.56602e-07	10C-C (iii)	0.938555
10C-C (ii)	297	456.997	5221.75	3.41	0.605873	5.62824	12.5018	0.000550045	2.51369e-07	2.51502e-07
10C-C (ii)	313	449.486	5257.66	3.41	0.605873	5.62824	12.5018	0.000550045	2.47237e-07	2.47368e-07
10C-C (ii)	336	441.548	5265.06	3.41	0.605873	5.62824	12.5018	0.000550045	2.42871e-07	2.43e-07
10C-C (iii)	297	7.53429	5226.88	1	0.605873	1.65051	16.4795	0.000725054	5.46277e-09	5.46496e-09
10C-C (iii)	313	97.5073	5383.56	1	0.605873	1.65051	16.4795	0.000725054	7.06981e-08	7.07265e-08
10C-C (iii)	336	97.1254	5273.82	1	0.605873	1.65051	16.4795	0.000725054	7.04212e-08	7.04495e-08
10D-A (i)	297	528.672	15777.4	2.6	0.828025	3.14	14.99	0.000659521	3.4867e-07	3.48824e-07	10D-A (i)	0.138479
10D-A (i)	313	564.314	16959.3	2.6	0.828025	3.14	14.99	0.000659521	3.72177e-07	3.72341e-07	10D-A (ii)	0.393036
10D-A (i)	336	557.207	16201	2.6	0.828025	3.14	14.99	0.000659521	3.67489e-07	3.67652e-07	10D-A (iii)	0.578298
10D-A (ii)	297	383.399	11988.8	2.82	0.828025	3.40569	14.7243	0.000647831	2.48378e-07	2.48489e-07
10D-A (ii)	313	425.052	12261.8	2.82	0.828025	3.40569	14.7243	0.000647831	2.75362e-07	2.75486e-07
10D-A (ii)	336	464.917	11843.9	2.82	0.828025	3.40569	14.7243	0.000647831	3.01188e-07	3.01323e-07
10D-A (iii)	298	390.768	11207.8	2.1	0.828025	2.53615	15.5938	0.000686088	2.68102e-07	2.68216e-07
10D-A (iii)	313	429.848	11480.3	2.1	0.828025	2.53615	15.5938	0.000686088	2.94914e-07	2.95039e-07
10D-A (iii)	336	472.888	11411.3	2.1	0.828025	2.53615	15.5938	0.000686088	3.24443e-07	3.24581e-07
10D-B (i)	297	1548.01	25280	4.79	0.895692	5.34782	12.7822	0.000562382	8.70574e-07	8.71025e-07	10D-B (i)	1.32391
10D-B (i)	313	1756.1	26724.6	4.79	0.895692	5.34782	12.7822	0.000562382	9.876e-07	9.88112e-07	10D-B (ii)	1.36742
10D-B (i)	336	2039.51	26920.4	4.79	0.895692	5.34782	12.7822	0.000562382	1.14698e-06	1.14758e-06	10D-B (iii)	0.942431
10D-B (ii)	297	1365.4	15349.2	3.95	0.895692	4.41	13.72	0.000603644	8.24217e-07	8.24615e-07
10D-B (ii)	313	1559.42	15936.4	3.95	0.895692	4.41	13.72	0.000603644	9.41334e-07	9.41789e-07
10D-B (ii)	336	1758.69	15798.1	3.95	0.895692	4.41	13.72	0.000603644	1.06162e-06	1.06213e-06
10D-B (iii)	297	494.304	9944.67	2.52	0.895692	2.81347	15.3165	0.000673887	3.33105e-07	3.3325e-07
10D-B (iii)	313	565.669	10398.4	2.52	0.895692	2.81347	15.3165	0.000673887	3.81197e-07	3.81362e-07
10D-B (iii)	336	648.642	10188.6	2.52	0.895692	2.81347	15.3165	0.000673887	4.37111e-07	4.373e-07
10D-C (ii)	297	664.377	12697.1	3.3	0.821875	4.01521	14.1148	0.000621014	4.12588e-07	4.12781e-07	10D-C (ii)	0.413349
10D-C (ii)	313	723.483	13412.2	3.3	0.821875	4.01521	14.1148	0.000621014	4.49293e-07	4.49504e-07	10D-C (iii)	1.58323
10D-C (ii)	336	770.405	12948.1	3.3	0.821875	4.01521	14.1148	0.000621014	4.78432e-07	4.78657e-07
10D-C (iii)	297	1349.06	11930.6	2.63	0.821875	3.2	14.93	0.000656881	8.86173e-07	8.86566e-07
10D-C (iii)	313	1451.27	11939.6	2.63	0.821875	3.2	14.93	0.000656881	9.53313e-07	9.53736e-07
10D-C (iii)	336	1647.34	12249.5	2.63	0.821875	3.2	14.93	0.000656881	1.0821e-06	1.08258e-06

## Sheet: total CH4 production
Site	Sample	depth range	Depth thickness (m)	rate (mmol m-3 d-1)	std deviation	horizontal integration of rate (mmol m-2 d-1)	uncertainty	Description	vertical integration (mmol m-2 d-1)	uncertainty	mol m-2 y-1	area of landform (m-2)	Total CH4 production in AL (mmol j-1)	uncertainty (error propagation)
TP	07-A(i)	0-10	0.1	92.7624	21.2006	9.27624	2.12006	Low center polygon (water saturated)	16.7623	2.96635	6.11823
TP	07-B(i)	10;20	0.1	47.0095	6.98079	4.70095	0.698079
TP	07-C(i)	20;30	0.1	27.8509	1.48204	2.78509	0.148204
TP	08-A (i)	0;10	0.1	153.687	33.8554	15.3687	3.38554	Trough (water-saturated)	28.3151	7.36369	10.335
TP	08-B (i)	10;20	0.1	79.0392	32.621	7.90392	3.2621
TP	08-C (i)	20;30	0.1	50.4248	7.16041	5.04248	0.716041
TP	09-A(i)	0;10	0.1	415.353	69.2063	41.5353	6.92063	high center (dry)	41.5439	6.93623	15.1635
TP	09-B (i)	10;20	0.1	0.0667334	0.128157	0.00667334	0.0128157
TP	09-C (i)	20;30	0.1	0.0187467	0.0277546	0.00187467	0.00277546
RP	10A-A (i)	0;10	0.1	0.0195711	0.0245249	0.00195711	0.00245249	high center (dry)	0.0334731	0.0228212		80309		0
RP	10A-B (i)	10;20	0.1	-0.0066058	0.00657083	-0.00066058	0.000657083						0
RP	10A-C (i)	20;30	0.1	0.0040106	0.00166434	0.00040106	0.000166434
RP	10A-D (i)	30;40	0.1	0.317755	0.195452	0.0317755	0.0195452
RP	10B-A (iii)	0;10	0.1	4.83891	2.85739	0.483891	0.285739	Trough (water-saturated)	5.04152	2.03077	1.84016	36152	182261	73416.4
RP	10B-B (i)	10;20	0.1	35.2383	15.7117	3.52383	1.57117
RP	10B-C (ii)	20;30	0.1	10.338	1.73866	1.0338	0.173866
RP	10C-A (i)	0;10	0.1	14.6886	5.1583	1.46886	0.51583	Low center polygon (water saturated)	2.38966	1.0364	0.872225	118901	284132	123229
RP	10C-B (i)	10;24	0.14	6.34031	3.28448	0.887644	0.459827
RP	10C-C (i)	24;35	0.11	0.301377	0.552218	0.0331515	0.060744
RP	10D-A (i)	0;10	0.1	0.369938	0.220818	0.0369938	0.0220818	high center (dry)	0.257948	0.128187	0.0941511	80309	20715.6	10294.6
RP	10D-B (i)	10;20	0.1	1.21125	0.23382	0.121125	0.023382
RP	10D-C (ii)	20;30	0.1	0.998291	0.827234	0.0998291	0.0827234
